# Supplementary material for: Cellular mechanoadaptation to substrate mechanical properties: contributions of substrate stiffness and thickness to cell stiffness measurements using AFM
Source: Royal Society of Chemistry journal article supplement (doi:10.1039/c3sm51786a), 2013-11-11
Supplement: c3sm51786a.pdf [file c3sm51786a.pdf]

**Supplementary material:** Cellular  
mechanoadaptation to substrate mechanical  
properties: contributions of substrate stiffness and  
thickness to cell stiffness measurements using AFM.

Shirish Vichare  
Department of Civil Engineering,  
Indian Institute of Technology Bombay,  
Mumbai India

Shamik Sen<sup>1</sup>  
Department of Biosciences and Bioengineering,  
Indian Institute of Technology Bombay,  
Mumbai India

Mandar M. Inamdar<sup>2</sup>  
Department of Civil Engineering,  
Indian Institute of Technology Bombay,  
Mumbai India

October 14, 2013

<sup>1</sup>shamiks@iitb.ac.in

<sup>2</sup>minamdar@iitb.ac.in

# 1 Supplementary Figure

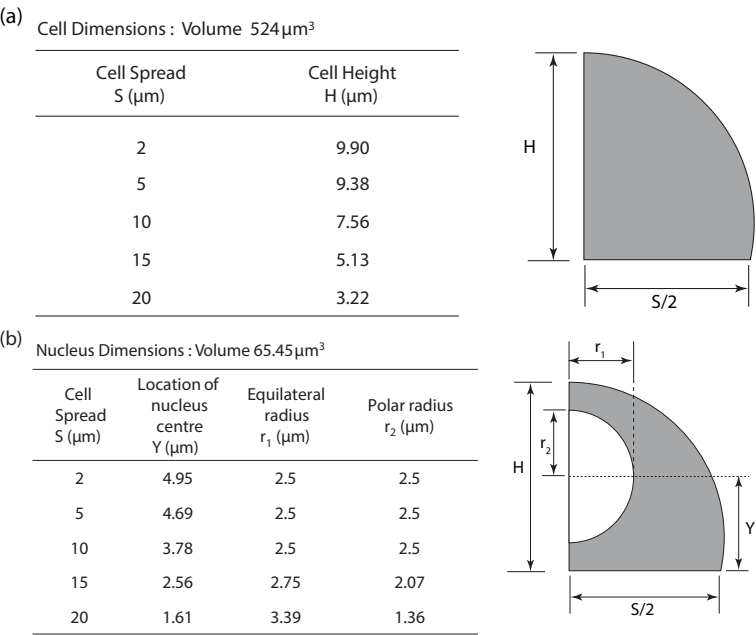

Fig. S1: Cellular geometries used in the main paper. (a) Cell dimensions for different spread geometries subject to constant volume. (b) Position and dimensions of the nucleus for different spread geometries subject to constant nuclear volume.

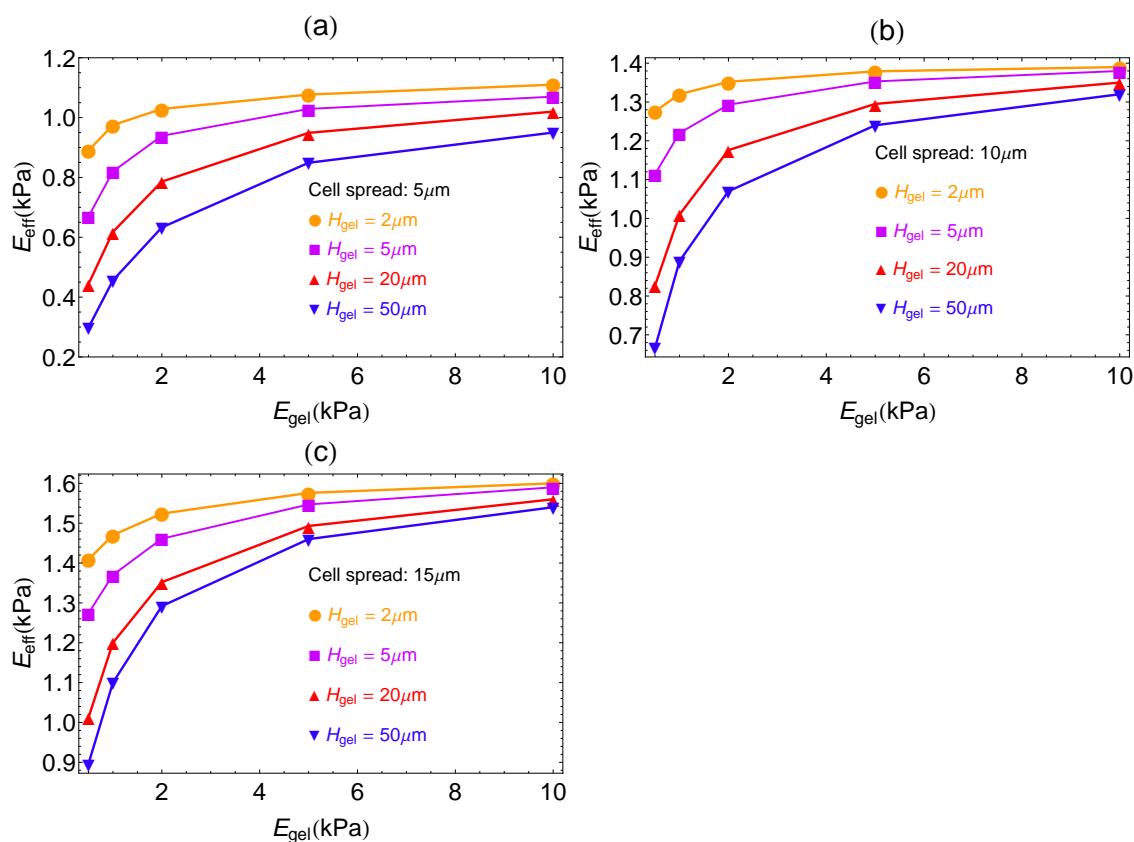

Fig. S2:  $E_{\text{eff}}$  versus  $E_{\text{gel}}$  for cell without nucleus at different cellular spreads  $S$  obtained for different values of  $H_{\text{gel}}$ . (a), (b) and (c) correspond to  $S$  equal to  $5\mu\text{m}$ ,  $10\mu\text{m}$  and  $15\mu\text{m}$ , respectively.

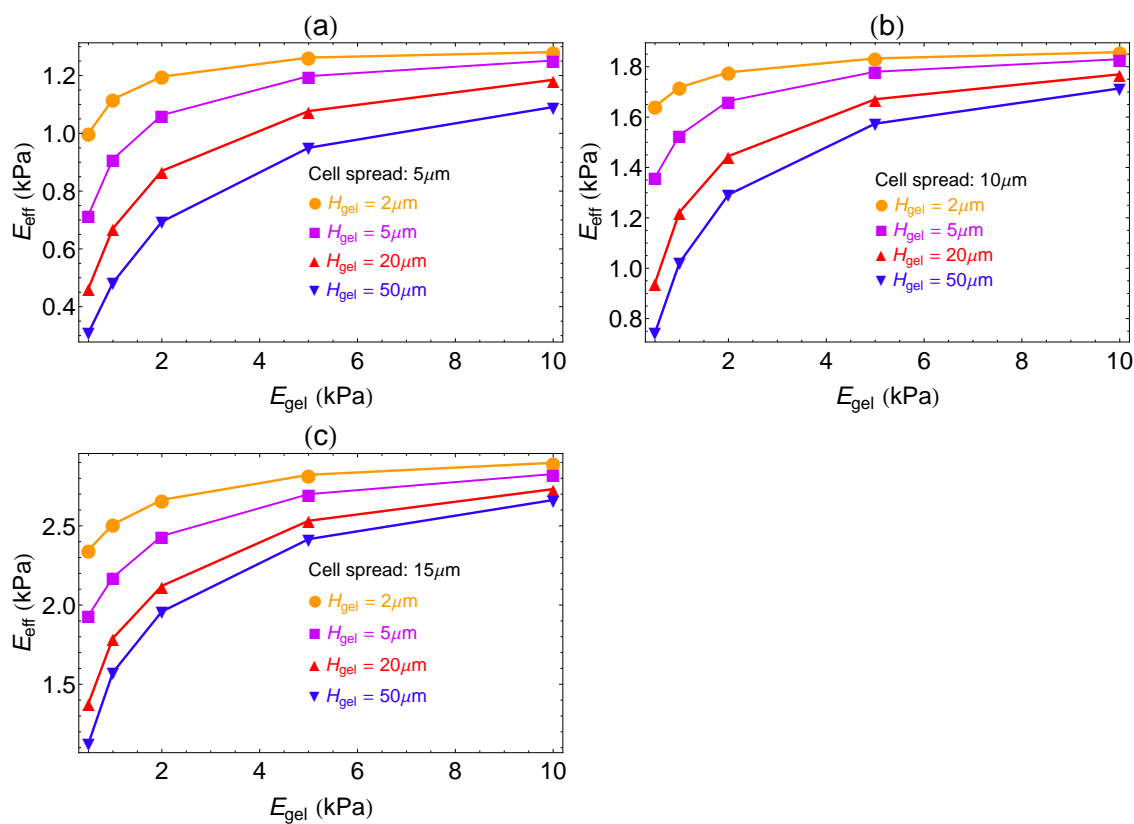

Fig. S3:  $E_{\text{eff}}$  versus  $E_{\text{gel}}$  for cell with nucleus at different cellular spreads  $S$  obtained for different values of  $H_{\text{gel}}$ . (a), (b) and (c) correspond to  $S$  equal to  $5 \mu\text{m}$ ,  $10 \mu\text{m}$  and  $15 \mu\text{m}$ , respectively.

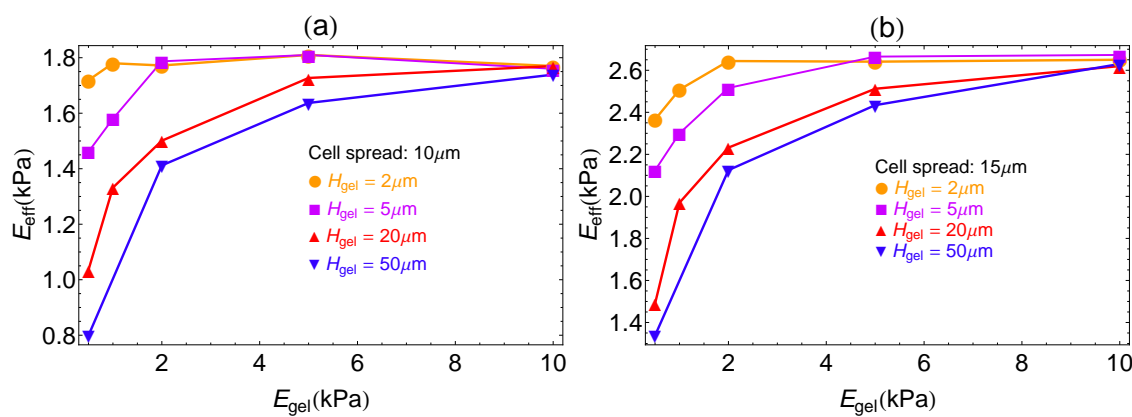

Fig. S 4:  $E_{\text{eff}}$  versus  $E_{\text{gel}}$  for cell without nucleus but with pre-stress of  $\sigma_0 = 0.5$  kPa at different cellular spreads  $S$ , obtained for different values of  $H_{\text{gel}}$ . (a) and (b) correspond to  $S$  equal to  $10\mu\text{m}$  and  $15\mu\text{m}$ , respectively.

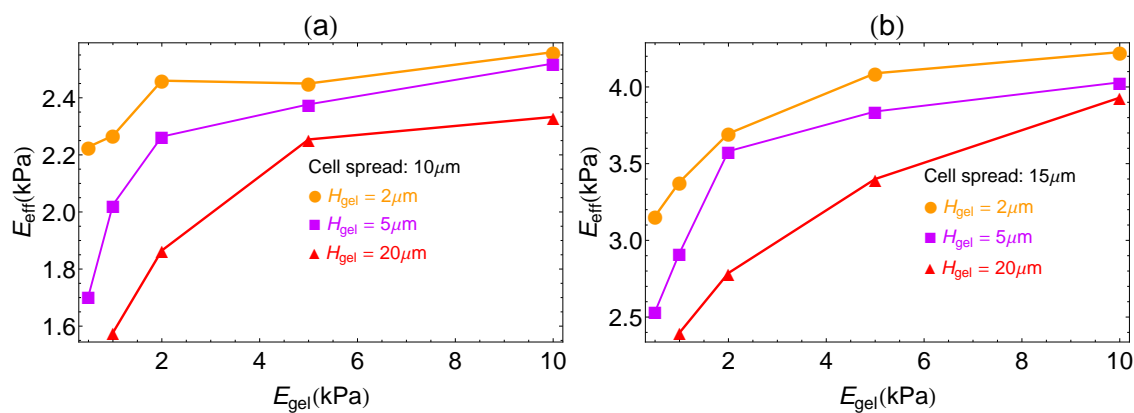

Fig. S5:  $E_{\text{eff}}$  versus  $E_{\text{gel}}$  for cell with nucleus and pre-stress of  $\sigma_0 = 0.5$  kPa at different cellular spreads  $S$ , obtained for different values of  $H_{\text{gel}}$ . (a) and (b) correspond to  $S$  equal to  $10\mu\text{m}$  and  $15\mu\text{m}$ , respectively.
